# Supplementary material for: An in situ ion exchange grown visible-light-driven Z-scheme AgVO3/AgI graphene microtube for enhanced photocatalytic performance
Source: Royal Society of Chemistry journal article supplement (doi:10.1039/c9nj05376j), 2019-12-17
Supplement: c9nj05376j1.pdf [file c9nj05376j1.pdf]

## Supporting Information

1

2

### 3 **In Situ Ion Exchange Grown Visible-light-driven Z-scheme** 4 **AgVO<sub>3</sub>/AgI Graphene Microtube for Enhanced Photocatalytic** 5 **Performance**

6 Yong Liang<sup>a,b</sup>, Yuexing Chen<sup>a</sup>, Li Lin<sup>a</sup>, Maojun Zhao<sup>a</sup>, Li Zhang<sup>a</sup>, Jun Yan<sup>b</sup>, Ying  
7 Wang<sup>c</sup>, Hui Chen<sup>d</sup>, Jun Zeng<sup>e</sup>, Yunsong Zhang<sup>a,\*</sup>

8 <sup>a</sup>College of Science, Sichuan Agricultural University, Yaan 625014, China

9 <sup>b</sup>College of Pharmacy and Biological Engineering, Chengdu University, Chengdu  
10 610106, China

11 <sup>c</sup>College of Water Conservancy and Hydropower Engineering, Sichuan  
12 Agricultural University, Yaan 625014, China

13 <sup>d</sup>College of life science, Sichuan Agricultural University, Yaan 625014, China

14 <sup>e</sup>Key Laboratory of Green Chemistry of Sichuan Institutes of Higher Education,  
15 Sichuan University of Science and Engineering, Zigong 643002, China

16 \*Corresponding author: Tel: +86 835 2885782; Fax: +86 835 2862227; Email  
17 address: yaanyunsong@126.com

18

### 19 **1 Method**

#### 20 **1.1 Synthesis of graphene oxide (GO)**

21 GO is prepared by chemical delamination of graphite powder through applying  
22 the modified Hummers' method. <sup>1</sup> At the beginning, a 9:1 mixture of concentrated

1 H<sub>2</sub>SO<sub>4</sub>/H<sub>3</sub>PO<sub>4</sub> (360:40 mL) was added to a mixture of graphite flakes (3.0 g, 1 wt  
2 equiv) and KMnO<sub>4</sub> (18.0 g, 6 wt equiv), producing a slight exotherm to 35-40 °C. The  
3 reaction was then heated to 50 °C and stirred for 12 h. The reaction was cooled to  
4 room temperature and poured onto ice (400 mL) with 30% H<sub>2</sub>O<sub>2</sub> (3 mL). For workup,  
5 the mixture was washed with 200 mL of 30% HCl by centrifugation (8000 rpm).  
6 Subsequently, the mixture was washed with water to neutrality, then washed with 200  
7 ml of ethanol and the supernatant decanted away. The solid obtained after  
8 centrifugation was vacuum-dried overnight at room temperature, obtaining 5.8 g of  
9 product.

## 10 **1.2 Characterizations**

11 The morphology and surface elements distribution of as-prepared samples were  
12 characterized by a scanning electron microscopy (SEM, JSM-7500F, Japan). The  
13 crystalline phases composition of all the samples was investigated using X-ray  
14 diffraction (XRD, DX-2600, China). In addition, the Fourier transform infrared (FTIR,  
15 Shimaduzu-8400S, Japan) was used to identify the chemical functional groups. The  
16 X-ray photoelectron spectroscopy (XPS, XSAM800, Britain) was also investigated.  
17 Raman spectra were performed on a Raman system (Thermo Scientific, DXR Smart,  
18 USA). The UV-vis diffuse reflectance spectra (UV-vis DRS) of the samples were  
19 obtained over a Lambda75 UV-vis spectrophotometer using BaSO<sub>4</sub> as reference.  
20 Photoluminescence (PL) emission and excitation spectra were recorded with FLS1000  
21 Edinburgh Instrument. The electrochemical impedance spectroscopy (EIS) was  
22 measured by an electrochemical system (CHI-660c, China).

## 1 2 Supplementary Results and Discussion

### 2 2.1 FT-IR and Raman spectra of samples

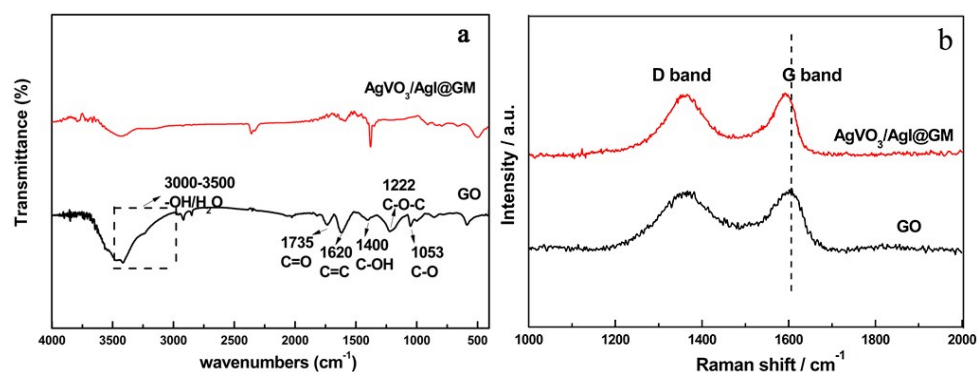

3

4 **Fig. S1** (a) FT-IR spectra of GO and 0.25  $\text{AgVO}_3/\text{AgI}@GM$ , (b) Raman spectra of

5 GO and 0.25  $\text{AgVO}_3/\text{AgI}@GM$ .

### 6 2.2 XPS analysis of samples

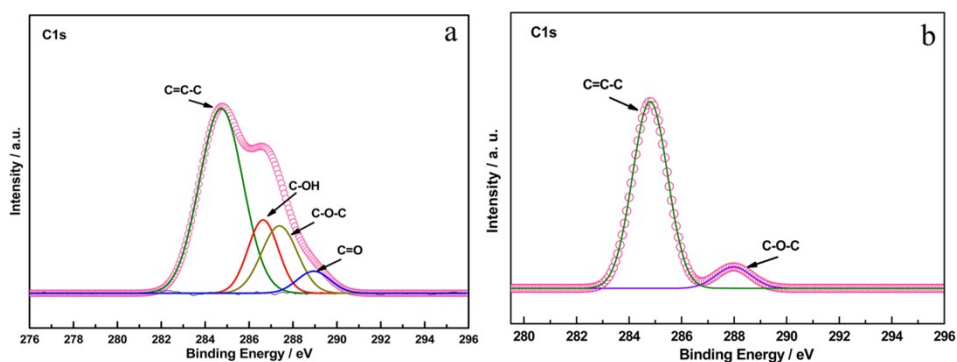

7

8 **Fig. S2** (a, b) XPS spectra of C1s of GO and 0.25  $\text{AgVO}_3/\text{AgI}@GM$ .

### 9 2.3 Band-gap estimation

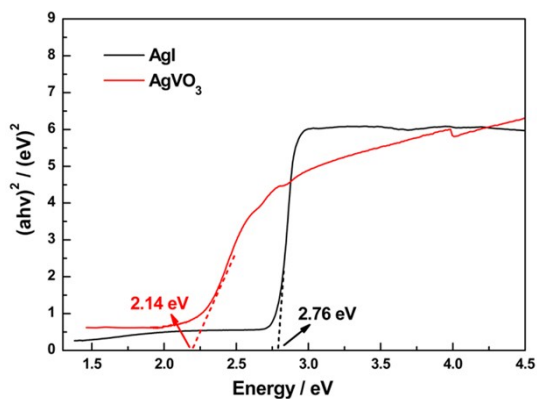

10

11

**Fig. S3** Plots of  $(ah\nu)^2$  vs. the energy of samples.

12

The energy band structures of the  $\text{AgVO}_3$  and  $\text{AgI}$  were discussed to better

1 understand the photocatalytic mechanism of the composites. Calculate the conduction  
2 band (CB) and valence band (VB) positions of  $\text{AgVO}_3$  and  $\text{AgI}$  according to equations  
3 (1) and (2) below.

$$4 \quad E_{\text{CB}} = X - E_{\text{C}} - 0.5E_{\text{g}} \quad (1)$$

$$5 \quad E_{\text{VB}} = E_{\text{g}} + E_{\text{CB}} \quad (2)$$

6 Where,  $E_{\text{CB}}$  and  $E_{\text{VB}}$  are CB edge potential and VB edge potential, respectively.  
7  $X$  is the electronegativity of the semiconductor, in which  $\text{AgVO}_3$  <sup>1</sup> and  $\text{AgI}$  <sup>2</sup> are 5.86  
8 eV and 5.48 eV, respectively.  $E_{\text{C}}$  is the energy of free electrons with a hydrogen scale  
9 of approximately 4.5 eV, and  $E_{\text{g}}$  is the band-gap energy of the semiconductors. Based  
10 on the equations (1) and (2), the CB and VB edge potentials of  $\text{AgVO}_3$  are 0.29 eV  
11 and 2.43 eV, and those of  $\text{AgI}$  are -0.40 eV and 2.36 eV, respectively.

## 12 2.4 The trapping experiments

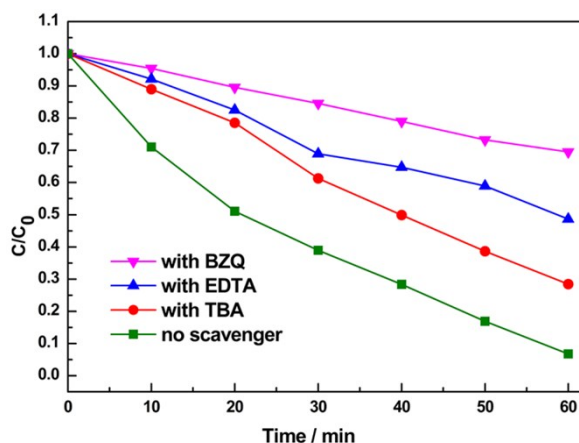

13

14 **Fig. S4** The trapping experiments of the 0.25  $\text{AgVO}_3/\text{AgI}@\text{GM}$ .

## 15 Reference

- 16 1. W. Zhao, Z. Wei, H. He, J. Xu, J. Li, S. Yang and C. Sun, *Appl Catal A Gen*, 2015, **501**, 74-82.  
17 2. X. Wang, J. Yang, S. Ma, D. Zhao, J. Dai and D. Zhang, *Catal Sci Technol*, **6**,  
18 10.1039.C1035CY00787A.

19
